# Supplementary material
Source: PubMed Central journal article supplement (PMC3090076)
Supplement: NIHMS268090-supplement-01.pdf [file NIHMS268090-supplement-01.pdf]

## SUPPLEMENTAL MATERIAL

**Table 1S.**

**Cox Proportional Hazards Model adjusted for Time of Day**

Primary Model without adjustment for AM/PM

|         | HR    | CI        | p-value |
|---------|-------|-----------|---------|
| Main    | 0.964 | 0.71-1.32 | 0.817   |
| < 5 mos | 1.72  | 1.08-2.75 | 0.0216  |
| ≥ 5 mos | 0.602 | 0.39-0.93 | 0.022   |

Adjusted for AM/PM

|        | HR    | CI        | p-value |
|--------|-------|-----------|---------|
| Main   | 0.919 | .67-1.26  | 0.6     |
| < 5mos | 1.71  | 1.06-2.77 | 0.0287  |

Although the number of surgeries in the morning (AM) was imbalanced by treatment overall and in the young patients, adjustment for this covariate had no effect on the proportional hazards models.

**Cox Proportional Hazard Model: Censoring at 30 days instead of 7 days**

|         | HR    | CI         | p-value |
|---------|-------|------------|---------|
| Main    | 0.94  | .7-1.25    | 0.658   |
| < 5 mos | 1.53  | 1.004-2.32 | 0.0481  |
| > 5 mos | 0.566 | .37-.87    | 0.0102  |

Of the 188 patients with observed extubation, 160 were extubated by 7 days, 186 were extubated by 30 days, and two patients (one in each arm) were extubated after 30 days including 1 in the placebo group and 1 in the Triostat group. The main results do not change substantially. For young patients, the effect is slightly diminished, but still significant. For older patients, the hazard ratio is still significant.

**Table 2S. Drug Use by Center**

|                        | <b>Site 0<br/>(N=106)</b> | <b>Site 1<br/>(N=26)</b> | <b>Site 2, 3&amp;4<br/>(N=35)</b> | <b>Site 5<br/>(N=26)</b> |
|------------------------|---------------------------|--------------------------|-----------------------------------|--------------------------|
| <b>DRUG</b> DOBUTAMINE | 1 ( 0.9%)                 | 0 ( 0.0%)                | 0 ( 0.0%)                         | 0 ( 0.0%)                |
| DOPAMINE               | 50 ( 47.2%)               | 19 ( 73.1%)              | 23 ( 65.7%)                       | 16 ( 61.5%)              |
| EPINEPHRINE            | 1 ( 0.9%)                 | 4 ( 15.4%)               | 8 ( 22.9%)                        | 1 ( 3.8%)                |
| MILRINONE              | 42 ( 39.6%)               | 17 ( 65.4%)              | 28 ( 80.0%)                       | 20 ( 76.9%)              |
| NITROPRUSSIDE          | 2 ( 1.9%)                 | 3 ( 11.5%)               | 4 ( 11.4%)                        | 0 ( 0.0%)                |
| NOREPINEPHRINE         | 0 ( 0.0%)                 | 2 ( 7.7%)                | 0 ( 0.0%)                         | 0 ( 0.0%)                |

Data are shown as percentage of patients receiving a particular drug. Use of individual drugs is similar across most centers, though site 0 shows less use of dopamine, epinephrine, and milrinone than the other centers. Data are pooled for 3 centers with enrollment between 10 and 13 patients.

Table 3S. Summary of Adverse Events from Time of Surgery to the First of Hospital Discharge, 30 Days Post-procedure or Death

|                                            | Placebo Total<br>(N=95) | Triostat Total<br>(N=98) | P     | Placebo, <<br>5 months<br>(N=50) | Triostat, <<br>5 months<br>(N=48) | P     | Placebo, >=<br>5 months<br>(N=45) | Triostat, >=<br>5 months<br>(N=50) | P     |
|--------------------------------------------|-------------------------|--------------------------|-------|----------------------------------|-----------------------------------|-------|-----------------------------------|------------------------------------|-------|
| At Least One AE                            | 82 (86.3%)              | 80 (81.6%)               | 0.376 | 45 (90.0%)                       | 42 (87.5%)                        | 0.695 | 37 (82.2%)                        | 38 (76.0%)                         | 0.458 |
| At Least One Serious AE                    | 12 (12.6%)              | 14 (14.3%)               | 0.736 | 8 (16.0%)                        | 8 (16.7%)                         | 0.929 | 4 (8.9%)                          | 6 (12.0%)                          | 0.622 |
| At Least One Unexpected AE                 | 40 (42.1%)              | 40 (40.8%)               | 0.856 | 25 (50.0%)                       | 22 (45.8%)                        | 0.680 | 15 (33.3%)                        | 18 (36.0%)                         | 0.785 |
| At Least One Possibly Treatment-Related AE | 45 (47.4%)              | 57 (58.2%)               | 0.151 | 26 (52.0%)                       | 34 (70.8%)                        | 0.065 | 19 (42.2%)                        | 23 (46.0%)                         | 0.836 |
| Death (any time on study)                  | 5 (5.3%)                | 3 (3.1%)                 | 0.493 | 4 (8.0%)                         | 3 (6.3%)                          | 1.000 | 1 (2.2%)                          | 0 (0.0%)                           | 0.474 |
| Death or Mechanical Life Support           | 5 (5.3%)                | 3 (3.1%)                 | 0.493 | 4 (8.0%)                         | 3 (6.3%)                          | 1.000 | 1 (2.2%)                          | 0 (0.0%)                           | 0.474 |
| Arrhythmia AE                              | 9 (9.5%)                | 11 (11.2%)               | 0.690 | 7 (14.0%)                        | 7 (14.6%)                         | 0.934 | 2 (4.4%)                          | 4 (8.0%)                           | 0.477 |
| JET                                        | 7 (7.4%)                | 8 (8.2%)                 | 0.837 | 5 (10.0%)                        | 5 (10.4%)                         | 0.946 | 2 (4.4%)                          | 3 (6.0%)                           | 0.735 |
| SVT                                        | 2 (2.1%)                | 3 (3.1%)                 | 1.000 | 2 (4.0%)                         | 2 (4.2%)                          | 1.000 | 0 (0.0%)                          | 1 (2.0%)                           | 1.000 |
| VT                                         | 1 (1.1%)                | 0 (0.0%)                 | 0.492 | 1 (2.0%)                         | 0 (0.0%)                          | 1.000 | 0 (0.0%)                          | 0 (0.0%)                           | 0.458 |

Table shows number of patients with adverse events for each treatment category and subgroup. Thus, one patient in placebo group had two types of arrhythmia. There were no significant differences between the placebo and Triostat group. Tachyarrhythmia was the primary safety indicator: JET, junctional ectopic tachycardia; SVT, supraventricular tachycardia; and VT, ventricular tachycardia. There were no significant differences or trends between placebo and treatment for the entire cohort or subgroups.
